# Supplementary material
Source: publisher figshare collection journal article supplement (https://acs.figshare.com/ndownloader/files/6295110)
Supplement: Supplementary file 1 [file 6295110]

# Supporting Information

## Drug Conjugation Affects Pharmacokinetics and Specificity of Kidney-Targeted Peptide Carriers

Maria Janzer<sup>†,‡</sup>, Gregor Larbig<sup>‡</sup>, Armin Kübelbeck<sup>‡</sup>, Artjom Wischnjow<sup>†</sup>, Uwe Haberkorn<sup>†</sup> and Walter Mier<sup>†</sup>

---

<sup>†</sup> Department of Nuclear Medicine, Heidelberg University Hospital, INF 400, 69120 Heidelberg, Germany <sup>‡</sup> Merck KGaA, Frankfurter Str. 250, 64293 Darmstadt, Germany

### Table of contents

|                   |                                                                                                                   |                                              |
|-------------------|-------------------------------------------------------------------------------------------------------------------|----------------------------------------------|
| <b>Figure S1:</b> | Time course of the scintigraphic distribution of LA- <sup>125</sup> I-y(MARIA) <sub>3</sub> .....                 | 2                                            |
| <b>Figure S2:</b> | Scintigraphic imaging of organs 60 min after bolus injection of LA- <sup>125</sup> I-y(MARIA) <sub>3</sub> .....  | 2                                            |
| <b>Figure S3:</b> | Time course of the scintigraphic distribution of (KKEEE) <sub>3</sub> K after conjugation with caffeic acid ..... | 3                                            |
| <b>Figure S4:</b> | D-Tyrosine versus L-Tyrosine radiolabeling .....                                                                  | <a href="#">Error! Bookmark not defined.</a> |
| <b>Figure S5:</b> | Competitive ligand-receptor study of two different peptides                                                       | 4                                            |

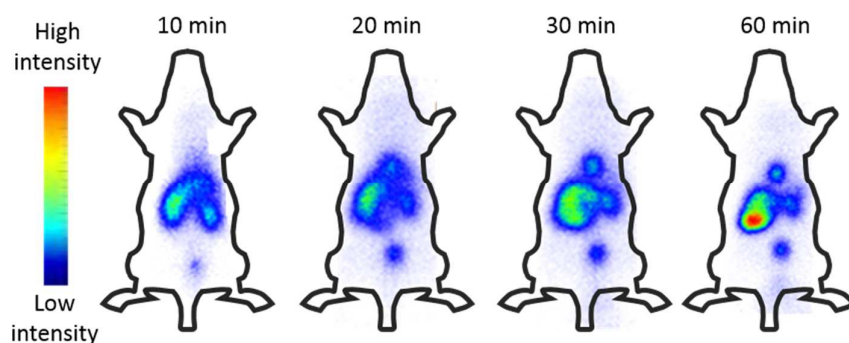

**Figure S1:** Time course of the scintigraphic distribution of LA-<sup>125</sup>I-y(MARIA)<sub>3</sub> after bolus injection in NMRI mouse. The conjugate shows a changed pharmacokinetic in comparison to bare peptide <sup>125</sup>I-y(MARIA)<sub>3</sub>. Changed excretion route over bile and liver can be assumed ([Error! Reference source not found.Figure S2](#)).

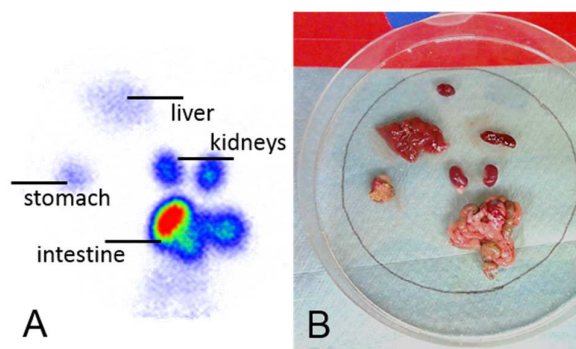

**Figure S2:** Scintigraphic imaging of organs 60 min after bolus injection of LA-<sup>125</sup>I-y(MARIA)<sub>3</sub> in NMRI mouse. **(A)** Majority of detected radiation was found in intestine, which indicates a changed excretion route of the peptide via bile into liver and intestine. Less amounts are detected in kidneys, liver and stomach. **(B)** Corresponding organs.

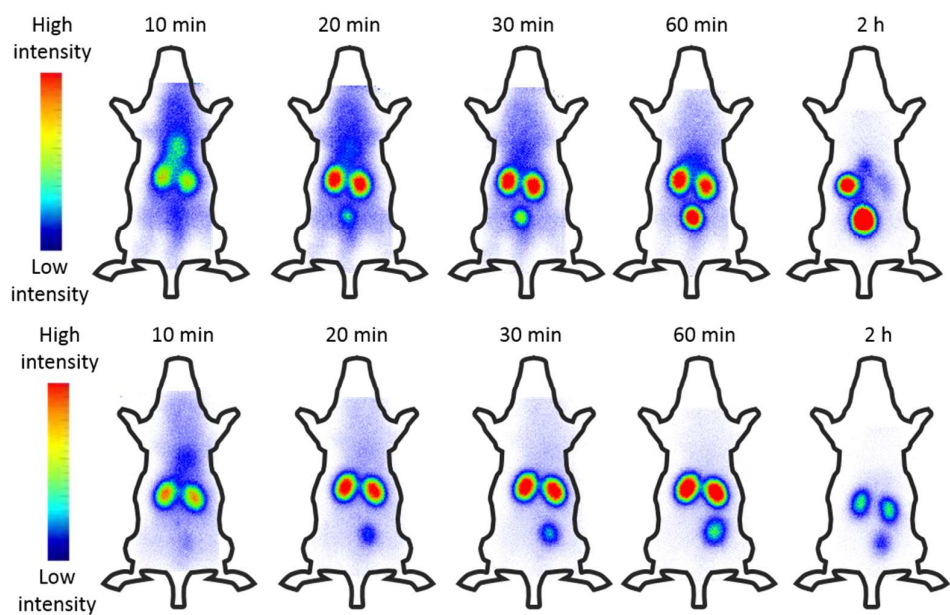

**Figure S3:** Time course of the scintigraphic distribution of (KKEEE)<sub>3</sub>K after conjugation with the hydrophilic caffeic acid *N*-terminally versus double  $\epsilon$ -binding after bolus injection in NMRI mouse. **Upper row:** *N*-terminally conjugated, caffeic acid-<sup>125</sup>I-y(KKEEE)<sub>3</sub>K. **Bottom row:**  $\epsilon$ -bounded, <sup>125</sup>I-y(KKK( $\epsilon$ -caffeic acid)(EEEKK)<sub>2</sub>K( $\epsilon$ -caffeic acid) showed a higher specificity in comparison to *N*-terminally bounded caffeic acid conjugate, even after double loading.

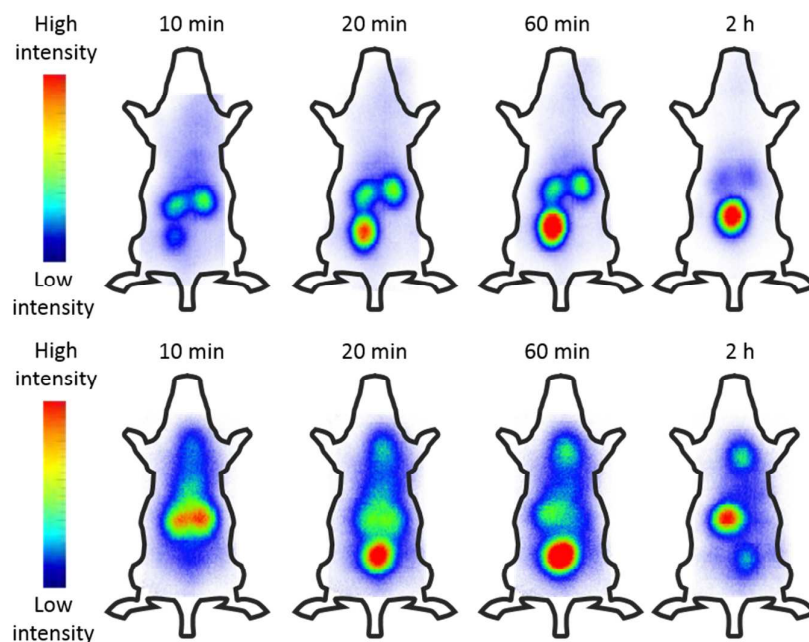

**Figure S4:** D-tyrosine versus L-tyrosine radiolabeling. **Upper Row:** The radiolabeling of  $(K\epsilon)_{10}Y-^{125}I$  via a D-tyrosine results in a tracer with stable accumulation in the kidneys followed by excretion to the bladder. **Bottom row:** In contrast, scintigraphic distribution of  $(K\epsilon)_{10}Y-^{125}I$  via radiolabeling of a naturally L-tyrosine leads to distribution in upper body followed by accumulation in stomach and thyroid. This indicates the deiodation of the peptide tracer.

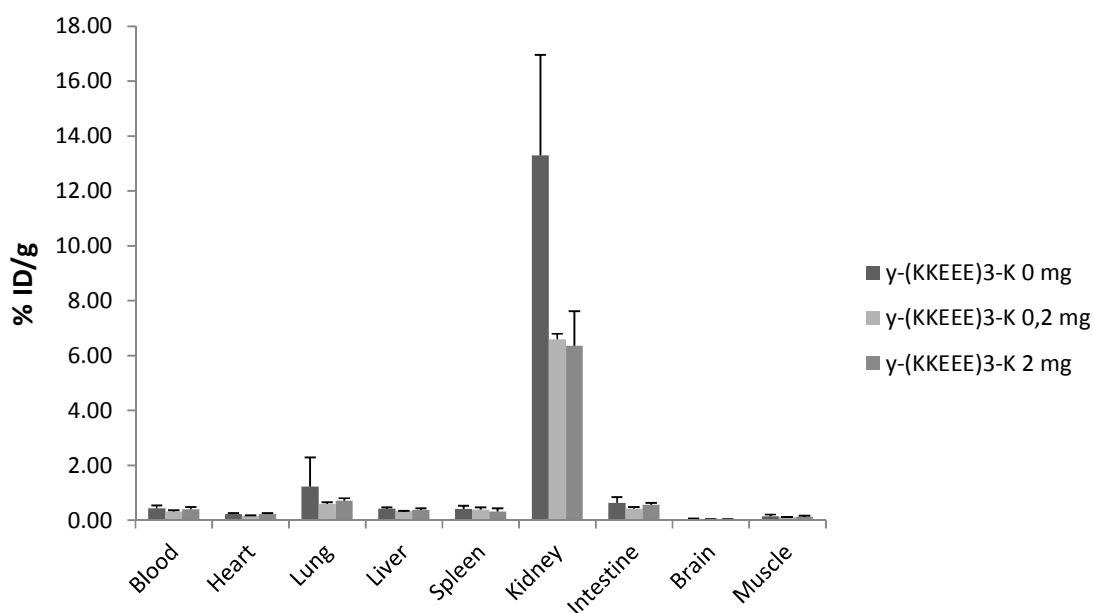

**Figure S5:** Competitive ligand-receptor study of two different peptides. Figure shows biodistribution study of  $^{177}Lu$ -DOTATOC, 60 minutes after application into three female NMRI-mice per group. The simultaneous application of the peptide  $\gamma$ -(KKEEE)<sub>3</sub>-K lead to a decrease of the renal accumulation of  $^{177}Lu$ -DOTATOC by ~50%.
